# Supplementary material for: Diagnostic magnetic resonance imaging characteristics of congenital mesoblastic nephroma: a retrospective multi-center International Society of Pediatric Oncology-Renal Tumor Study Group (SIOP-RTSG) radiology panel study
Source: Springer Nature journal article supplement (doi:10.1007/s00247-024-05918-4), 2024-04-13
Supplement: MOESM1 [file 26975824]

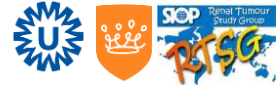

**Case Report Form – Retrospective study**  
***MRI-findings – Patient characteristics***

|                                                |
|------------------------------------------------|
| <b>STUDY NUMBER</b><br><br><b>.. R . . . .</b> |
|------------------------------------------------|

Type of CMN  Classic  Cellular  Mixed  
 Unknown

Age at diagnosis (*months, rounded down*)

Sex  Male  Female

Bilateral tumor at presentation  Yes  No

• If yes: Study nr. contralateral tumor   NA

Tumor side  Right  Left

Metastatic disease at diagnosis  Yes  No  NA

• If metastatic disease: Site(s) of metastasis/metastases

Other remarks concerning the patient characteristics and diagnosis:

**Case Report Form – Retrospective study**  
***MRI-findings – Imaging characteristics at diagnosis (1)***

|                                         |
|-----------------------------------------|
| <b>STUDY NUMBER</b><br><br>.. R .. .. . |
|-----------------------------------------|

Number of lesions on MRI at diagnosis  1  2  More:

• Lesion nr.

Dimensions of the lesion (*three dimensions; cm, one decimal*)

Location of the lesion in the kidney  Central  Peripheral  
 Indistinguishable / Impossible to determine

Regional lymph nodes (enlarged)  Yes  No  NA

Additional information lymph nodes (size, enhancing, etc)   NA

Margins  Well-defined  Ill-defined  NA

(Pseudo) capsule  Yes  No  NA

**Growth pattern**

Breach of the tumor capsule  Yes  No  NA

Evidence of intra-peritoneal tumor spread  Yes  No  NA

Infiltrative growth pattern  Yes  No  NA

Venous invasion / Tumor thrombus  Yes  No  NA

**Tumor characteristics of solid components**

T2-weighted imaging (*compared to renal cortex*) ·  Homogeneous  Heterogeneous  Other:

·  Hyper-intense  Hypo-intense  Iso-intense

T1-weighted imaging (*compared to renal cortex*) ·  Homogeneous  Heterogeneous  Other:

·  Hyper-intense  Hypo-intense  Iso-intense

Hemorrhage / Necrosis  Yes  No  NA

• If yes:  Limited  More extensive

Cysts  Yes  No  NA

• If yes: specification/size of the cysts:   NA

• In case of a (completely) cystic tumor: Septation  Yes  No  NA

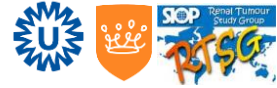

**Case Report Form – Retrospective study**  
***MRI-findings – Imaging characteristics at diagnosis (2)***

|                                               |
|-----------------------------------------------|
| <b>STUDY NUMBER</b><br><br><b>.. R .. . .</b> |
|-----------------------------------------------|

• Lesion nr.

**Tumor characteristics of solid components (continuation)**

- |                                          |                              |                             |                             |
|------------------------------------------|------------------------------|-----------------------------|-----------------------------|
| Fatty tissue                             | <input type="checkbox"/> Yes | <input type="checkbox"/> No | <input type="checkbox"/> NA |
| Subcapsular fluid                        | <input type="checkbox"/> Yes | <input type="checkbox"/> No | <input type="checkbox"/> NA |
| Increased vascularity                    | <input type="checkbox"/> Yes | <input type="checkbox"/> No | <input type="checkbox"/> NA |
| Concentric ring sign / Double-layer sign | <input type="checkbox"/> Yes | <input type="checkbox"/> No | <input type="checkbox"/> NA |

**Enhancement**

- Enhancement pattern
- Homogeneous
  - Heterogeneous
  - Band-like areas of late or non-enhancement
  - No enhancement
  - Other:

Other remarks concerning the characteristics and appearance of the lesion(s):



**Case Report Form – Retrospective study**  
***MRI-findings – Imaging characteristics at diagnosis (3)***

|                                        |
|----------------------------------------|
| <b>STUDY NUMBER</b><br><br>.. R .. . . |
|----------------------------------------|

• Lesion nr.

DWI-MRI available for review?  Yes  No

• If yes:

Diffusion restriction of the solid part of the lesion compared to healthy (contralateral) renal tissue  Yes  No

If available:

b-values used for ADC calculation (*lowest-highest*) b  / b

• ADC-value of first representative ROI with tumor tissue ( $*10^{-3} \text{ mm}^2/\text{s}$ , two decimals)

Dimensions of the first representative ROI  Diameter (cm)  or  Surface (cm<sup>2</sup>)

• ADC-value of second representative ROI with tumor tissue ( $*10^{-3} \text{ mm}^2/\text{s}$ , two decimals)

Dimensions of the second representative ROI  Diameter (cm)  or  Surface (cm<sup>2</sup>)

• ADC-value of third representative ROI with tumor tissue ( $*10^{-3} \text{ mm}^2/\text{s}$ , two decimals)

Dimensions of the third representative ROI  Diameter (cm)  or  Surface (cm<sup>2</sup>)

• ADC-value of fourth representative ROI with tumor tissue ( $*10^{-3} \text{ mm}^2/\text{s}$ , two decimals)

Dimensions of the fourth representative ROI  Diameter (cm)  or  Surface (cm<sup>2</sup>)
